# Supplementary material
Source: Springer Nature journal article supplement (https://www.springermedizin.de/resource/supplementary/12911_2011_473_MOESM1_ESM.pdf/9526040)
Supplement: MOESM1 [file 9526040]

Organizational  
Perspectives

Personal  
Perspectives

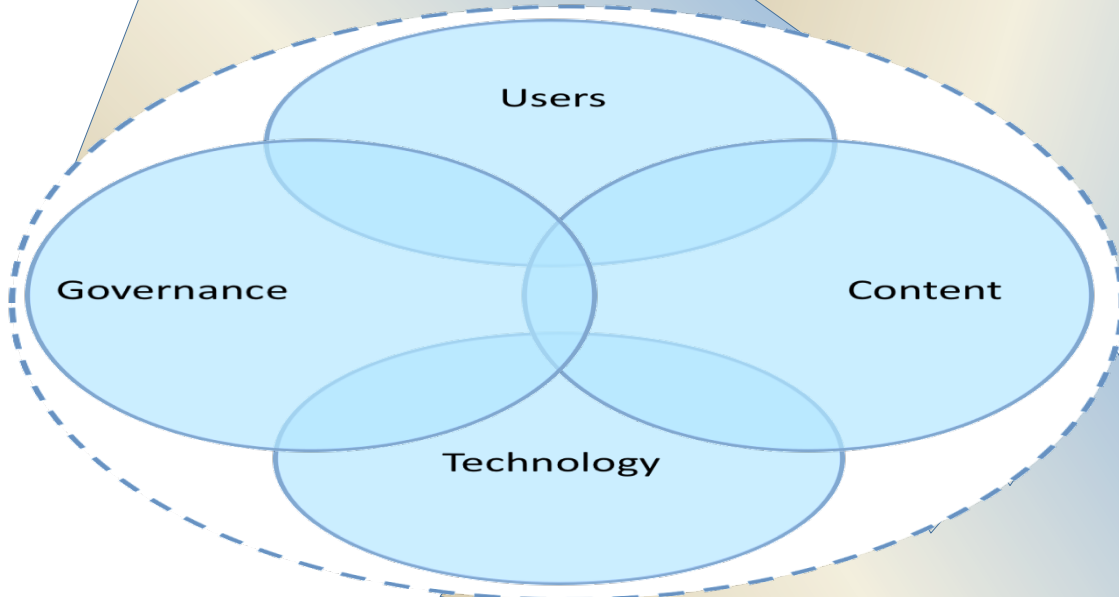

Governance

Users

Content

Technology

Technical  
Perspective
